# Supplementary material for: Zn-derived ligand engineering towards stable and bright CsPbI3 nanocrystals for white emitting
Source: Royal Society of Chemistry journal article supplement (doi:10.1039/d2tc02995b), 2022-01-01
Supplement: d2tc02995b1.pdf [file d2tc02995b1.pdf]

## Supporting Information

### Zn-Derived Ligand Engineering towards Stable and Bright CsPbI<sub>3</sub>

#### Nanocrystals for White Emitting

Wenbin Shi,<sup>a</sup> Xiao Zhang,<sup>b\*</sup> Hsueh Shih Chen,<sup>c</sup> Katarzyna Matras-Postolek,<sup>b</sup> and Ping Yang<sup>a\*</sup>

<sup>a</sup>. School of Material Science and Engineering, University of Jinan, Jinan, 250022, PR China. E-mail: mse\_yangp@ujn.edu.cn

<sup>b</sup>. Faculty of Chemical Engineering and Technology, Cracow University of Technology, Krakow, 31-155, Poland. E-mail: friends\_zhangxiao@yahoo.co.jp

<sup>c</sup>. Department of Materials Science & Engineering, National Tsing Hua University, Hsinchu City, 300, Taiwan

**Table S1.** Element molar ratios of CsPbI<sub>3</sub> NCs from XPS analysis.

| Sample                        | Cs [%] | Pb [%] | I [%] | Zn [%] |
|-------------------------------|--------|--------|-------|--------|
| CsPbI <sub>3</sub>            | 4.3    | 4.8    | 12.9  | 0      |
| Zn:CsPbI <sub>3</sub>         | 4.2    | 4.6    | 11.8  | 0.5    |
| DDT-<br>Zn:CsPbI <sub>3</sub> | 4.3    | 4.4    | 12.3  | 0.5    |

**Table S2.** PL peak position and FWHM of CsPbI<sub>3</sub> NCs

| Sample                 | PL peak [nm] | FWHM [nm] |
|------------------------|--------------|-----------|
| Pb:Zn 1:0              | 696          | 33.9      |
| Pb:Zn 7:3              | 695          | 33.7      |
| Pb:Zn 1:1              | 693          | 34.2      |
| Pb:Zn 3:7              | 689          | 34.5      |
| Pb:Zn 1:3              | 687          | 36.2      |
| DDT 50 μL (Pb:Zn 3:7)  | 689          | 34.0      |
| DDT 100 μL (Pb:Zn 3:7) | 689          | 33.6      |
| DDT 150 μL (Pb:Zn 3:7) | 689          | 34.3      |
| DDT 200 μL (Pb:Zn 3:7) | 689          | 33.9      |

**Table S3.** Radiative and non-radiative recombination rates of CsPbI<sub>3</sub> NCs

| Sample                                                          | $\tau_{\text{ave}}$ (ns) | PLQY (%) | $\Gamma_{\text{rad}}$ ( $\mu\text{S}^{-1}$ ) | $\Gamma_{\text{non-rad}}$ ( $\mu\text{S}^{-1}$ ) |
|-----------------------------------------------------------------|--------------------------|----------|----------------------------------------------|--------------------------------------------------|
| CsPbI <sub>3</sub>                                              | 49.8                     | 20.5     | 4.1                                          | 15.9                                             |
| DDT-CsPbI <sub>3</sub> (DDT: 50 $\mu\text{L}$ )                 | 51.7                     | 22.3     | 4.3                                          | 15.0                                             |
| DDT-CsPbI <sub>3</sub> (DDT: 100 $\mu\text{L}$ )                | 55.6                     | 25.9     | 4.7                                          | 13.3                                             |
| DDT-CsPbI <sub>3</sub> (DDT: 150 $\mu\text{L}$ )                | 53.7                     | 24.9     | 4.6                                          | 13.9                                             |
| DDT-CsPbI <sub>3</sub> (DDT: 200 $\mu\text{L}$ )                | 52.1                     | 23.5     | 4.5                                          | 14.7                                             |
| Zn:CsPbI <sub>3</sub> (Pb:Zn 3:1)                               | 96.8                     | 45.7     | 4.7                                          | 5.6                                              |
| Zn:CsPbI <sub>3</sub> (Pb:Zn 7:3)                               | 107.1                    | 51.3     | 4.8                                          | 4.5                                              |
| Zn:CsPbI <sub>3</sub> (Pb:Zn 1:1)                               | 114.1                    | 55.6     | 4.9                                          | 3.9                                              |
| Zn:CsPbI <sub>3</sub> (Pb:Zn 3:7)                               | 150.1                    | 78.1     | 5.2                                          | 1.5                                              |
| Zn:CsPbI <sub>3</sub> (Pb:Zn 3:1)                               | 129.6                    | 65.2     | 5.0                                          | 2.8                                              |
| DDT-Zn:CsPbI <sub>3</sub> (Pb:Zn 3:7) (DDT: 50 $\mu\text{L}$ )  | 165.9                    | 88.5     | 5.3                                          | 0.8                                              |
| DDT-Zn:CsPbI <sub>3</sub> (Pb:Zn 3:7) (DDT: 100 $\mu\text{L}$ ) | 178.6                    | 95.4     | 5.4                                          | 0.2                                              |
| DDT-Zn:CsPbI <sub>3</sub> (Pb:Zn 3:7) (DDT: 150 $\mu\text{L}$ ) | 166.5                    | 89.2     | 5.4                                          | 0.6                                              |
| DDT-Zn:CsPbI <sub>3</sub> (Pb:Zn 3:7) (DDT: 200 $\mu\text{L}$ ) | 85.5                     | 40.6     | 4.8                                          | 7.0                                              |

The radiative and non-radiative recombination rates were estimated as follows.

$$\Gamma_{\text{rad}} = \eta_{\text{PL}} / \tau_{\text{ave}} \quad (1)$$

$$\Gamma_{\text{non-rad}} = (1 - \eta_{\text{PL}}) / \tau_{\text{ave}} \quad (2)$$

Where,  $\Gamma_{\text{rad}}$  and  $\Gamma_{\text{non-rad}}$  were radiative and non-radiative recombination rates, respectively.  $\eta_{\text{PL}}$  and  $\tau_{\text{ave}}$  were the PLQY and average lifetime of samples, respectively.

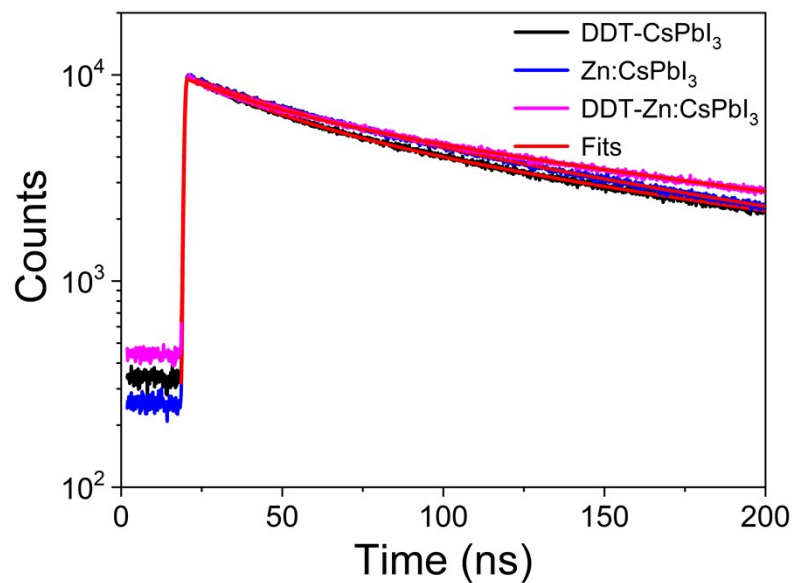

**Fig. S1** PL decay plots of DDT-CsPbI<sub>3</sub>, Zn:CsPbI<sub>3</sub> and DDT-Zn:CsPbI<sub>3</sub> NCs.

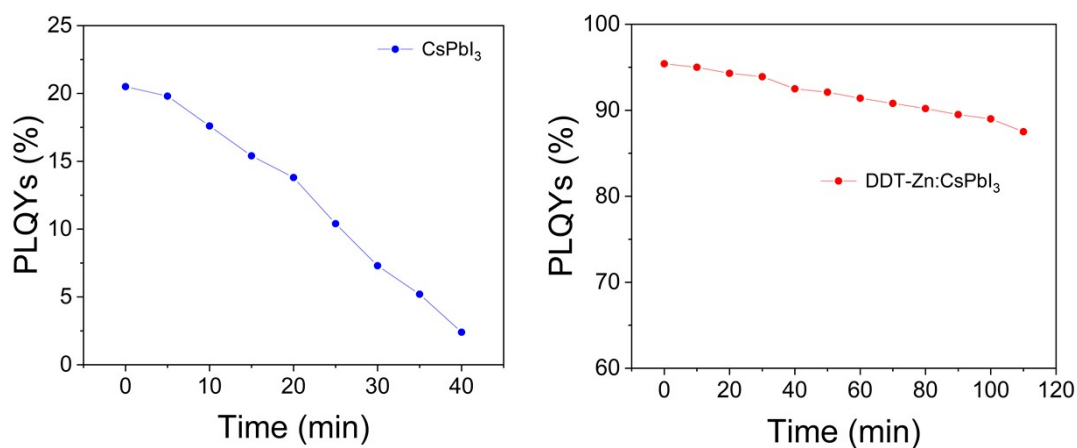

**Fig. S2** Evolution of PLQYs of CsPbI<sub>3</sub> and DDT-Zn:CsPbI<sub>3</sub> NCs under 365 nm UV light irradiation.

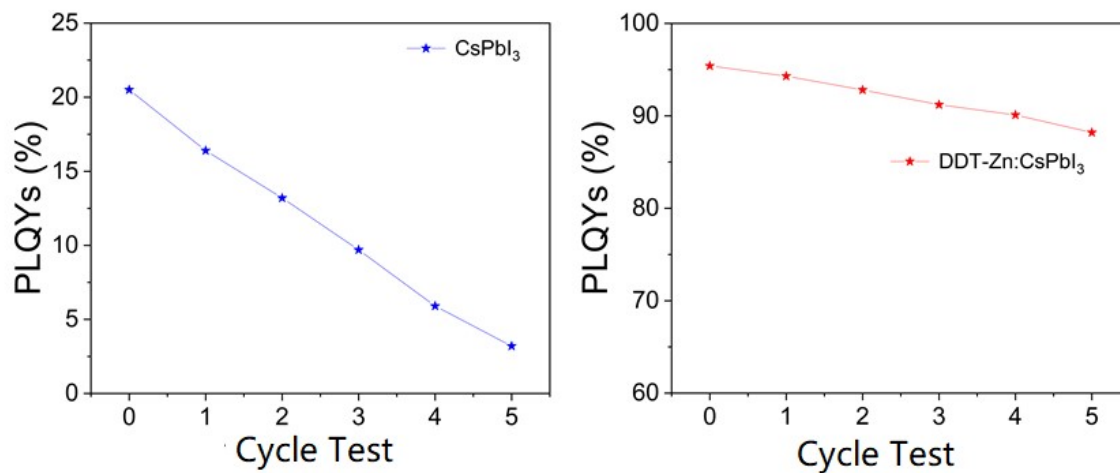

**Fig. S3** Evolution of PLQYs of CsPbI<sub>3</sub> and DDT-Zn:CsPbI<sub>3</sub> NCs after hot-treatment cycles.

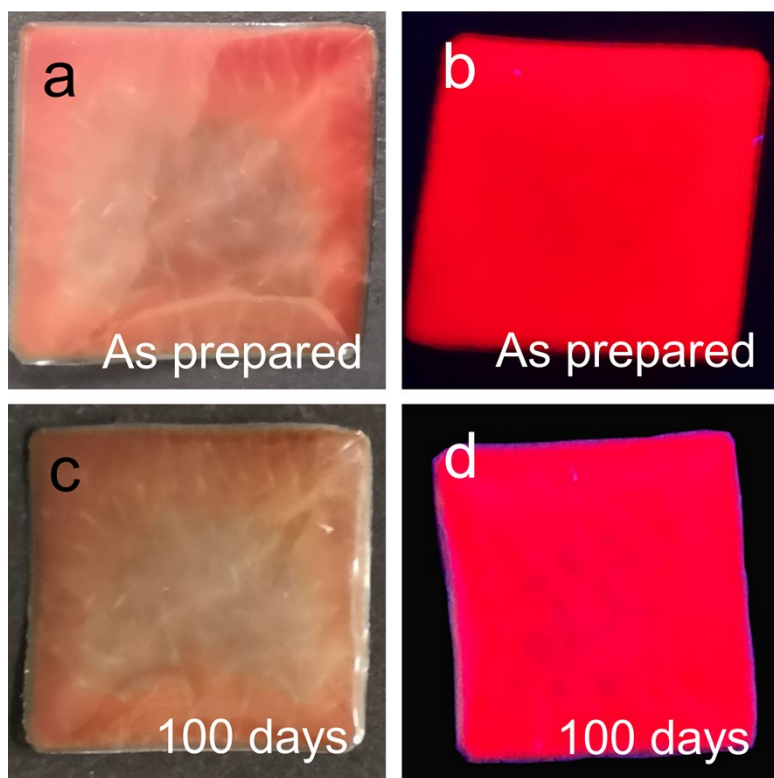

**Fig. S4** Photographs of as-prepared (a and b) DDT-Zn:CsPbI<sub>3</sub> NCs Films and after 100 days (c and d) under room light (a and c) and 365 nm UV light (b and d) irradiation.

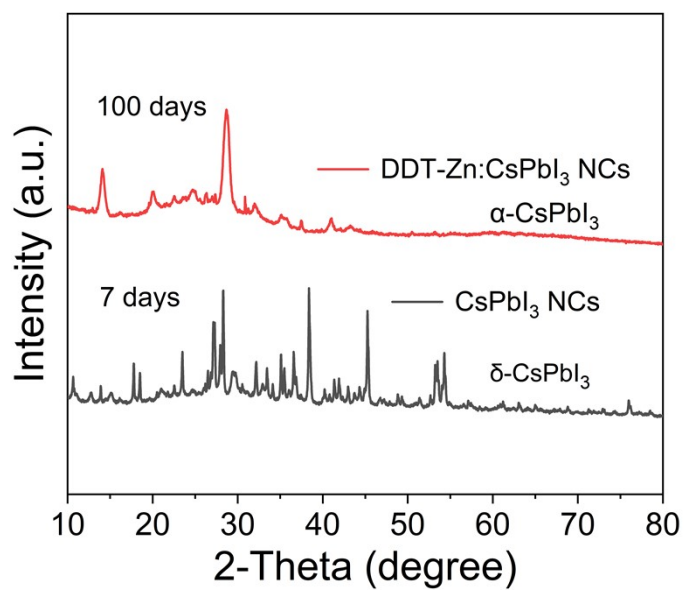

**Fig. S5** XRD patterns of CsPbI<sub>3</sub> and DDT-Zn:CsPbI<sub>3</sub> NCs after 100 days.

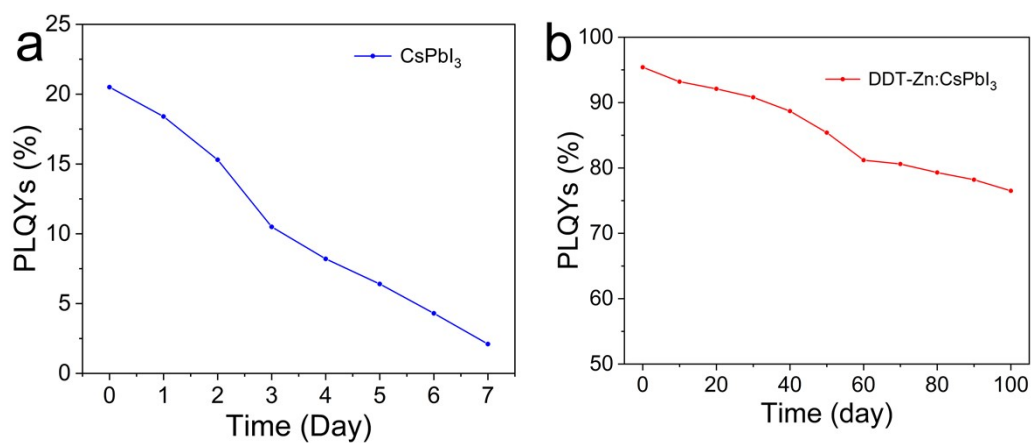

**Fig. S6** Evolution of PLQYs of CsPbI<sub>3</sub> and DDT-Zn:CsPbI<sub>3</sub> film after 100 days.

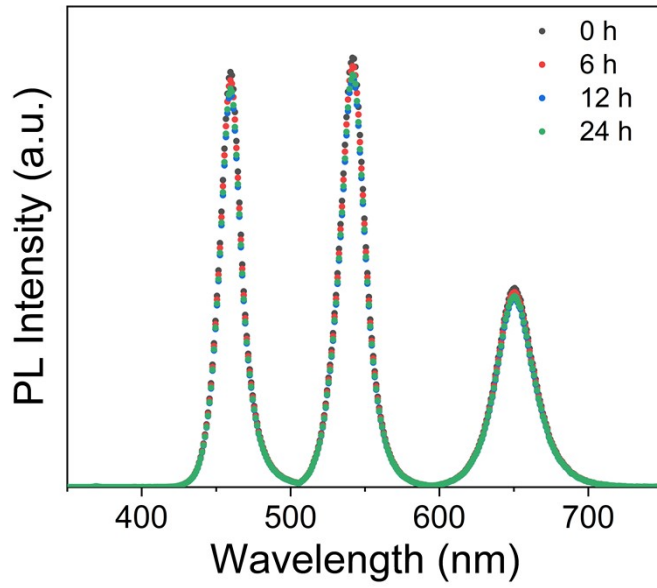

**Fig. S7** Emission spectra of WLEDs obtained after different running periods.

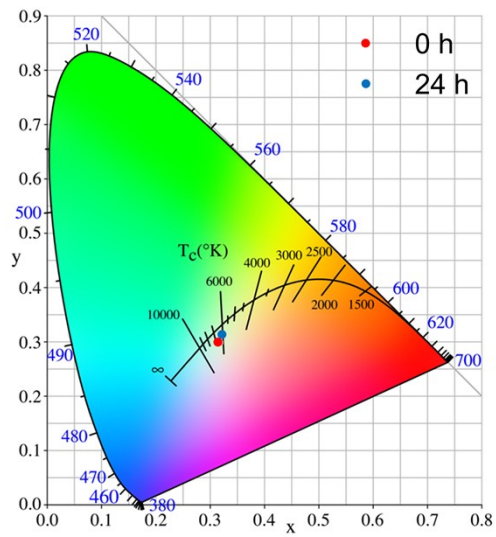

**Fig. S8** CIE coordinates of WLEDs obtained after different running periods.
